# Supplementary material
Source: PubMed Central journal article supplement (PMC5263178)
Supplement: NIHMS835136-supplement-Supplementary_Figure_1.pdf [file NIHMS835136-supplement-Supplementary_Figure_1.pdf]

## Supplementary Figure I

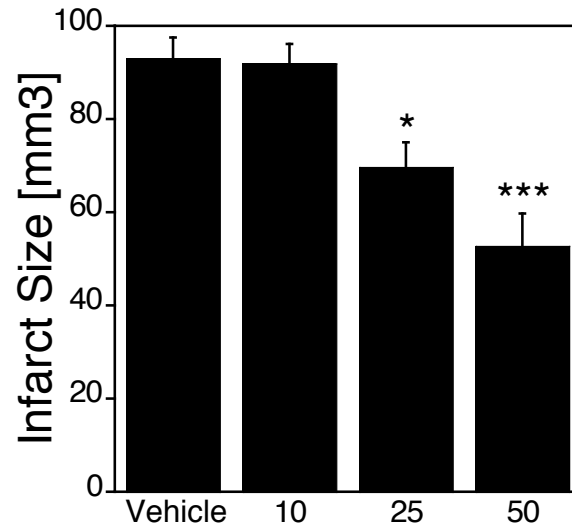

Infarct size in the classical filament model of MCAO. C57Bl6J mice were subjected to 90 minutes transient MCAO according to van Leyen et al<sup>1</sup>. ML351 at the indicated dosage [mg/kg] or an equal volume of vehicle was injected intraperitoneally two hours after onset of ischemia. Following sacrifice at 24 hours, infarct sizes were determined by staining with 2,3,5-triphenyltetrazolium chloride (TTC) (n=8/group; \*p<0.05, \*\*\*p<0.001).

1. van Leyen K, Kim HY, Lee SR, Jin G, Arai K, Lo EH. Baicalein and 12/15-lipoxygenase in the ischemic brain. *Stroke*. 2006;37:3014-3018
